# Supplementary material
Source: PubMed Central journal article supplement (PMC8207534)
Supplement: NIHMS1065868-supplement-Supplemental_Materials.pdf [file NIHMS1065868-supplement-Supplemental_Materials.pdf]

**Supplementary Table 1: Clinical characteristics of mucinous ovarian tumor patient cohort**

|                              | Test set (n=155) |      |          |     | Validation cohort (n=205) |      |          |     |
|------------------------------|------------------|------|----------|-----|---------------------------|------|----------|-----|
|                              | MBOT (n,%)       |      | MC (n,%) |     | MBOT(n,%)                 |      | MC (n,%) |     |
| Case numbers                 | 50               |      | 105      |     | 46                        |      | 159      |     |
| Stage I/II                   | 36               | 72%  | 85       | 81% | 44                        | 96%  | 108      | 68% |
| Stage III/IV                 | 2                | 4%   | 14       | 13% | 1                         | 2%   | 18       | 11% |
| Stage missing                | 12               | 24%  | 6        | 6%  | 1                         | 2%   | 33       | 21% |
| Low-grade                    | 50               | 100% | 38       | 36% | 46                        | 100% | 73       | 46% |
| High-grade                   | 0                | 0%   | 62       | 59% | 0                         | 0%   | 59       | 37% |
| Grade missing                | 0                | 0%   | 5        | 5%  | 0                         | 0%   | 27       | 17% |
| 5 year overall survival rate | 95%              |      | 67%      |     | 85%                       |      | 75%      |     |

| <b>Supplementary Table 2: Ovarian tumour study sites</b> |                                                           |                 |              |                                                                                                                                              |                                                                                                                                                                                                                                                                                                                                                                                                                                                         |
|----------------------------------------------------------|-----------------------------------------------------------|-----------------|--------------|----------------------------------------------------------------------------------------------------------------------------------------------|---------------------------------------------------------------------------------------------------------------------------------------------------------------------------------------------------------------------------------------------------------------------------------------------------------------------------------------------------------------------------------------------------------------------------------------------------------|
| <i>Test set</i>                                          |                                                           |                 |              |                                                                                                                                              |                                                                                                                                                                                                                                                                                                                                                                                                                                                         |
| <b>Study</b>                                             | <b>Name</b>                                               | <b>Location</b> | <b>Years</b> | <b>Ascertainment of Patients and Clinical Data</b>                                                                                           | <b>Pathology Data and Review</b>                                                                                                                                                                                                                                                                                                                                                                                                                        |
| AOV                                                      | Alberta Ovarian Tumor Types Study                         | Canada          | 1978-2010    | Population-based Alberta Cancer Registry; annual updates are performed for vital statistics                                                  | Pathology reports and histological slides review by the study pathologist                                                                                                                                                                                                                                                                                                                                                                               |
| WAG                                                      | Western Australia Group                                   | Australia       | 2013-present | St John of God Hospital, Subiaco, WA and King Edward Memorial Hospital, Perth WA                                                             | Pathology reports and histological slides reviewed by study pathologist                                                                                                                                                                                                                                                                                                                                                                                 |
| <i>Validation cohort</i>                                 |                                                           |                 |              |                                                                                                                                              |                                                                                                                                                                                                                                                                                                                                                                                                                                                         |
| BGS                                                      | Breakthrough Generations Study                            | UK              | 1988-2013    | Follow-up of a national general population cohort study                                                                                      | Pathology reports                                                                                                                                                                                                                                                                                                                                                                                                                                       |
| GER                                                      | Germany Ovarian Cancer Study                              | Germany         | 1993-1996    | 26 hospitals in the study regions                                                                                                            | Pathology reports were requested from the respective pathology institutes. Tissue samples were provided by the tissue bank of the National Center for Tumor Diseases (NCT, Heidelberg, Germany) in accordance with the regulations of the tissue bank and the approval of the ethics committee of Heidelberg University and by other pathology institutes. Histological slides were reviewed by gynecologic pathologist at the University of Heidelberg |
| HAW                                                      | Hawaii Ovarian Cancer Study                               | US              | 1993-2008    | Hawaii Tumor Registry and medical records                                                                                                    | Pathology reports and histological slides reviewed by study pathologist                                                                                                                                                                                                                                                                                                                                                                                 |
| HOP                                                      | Hormones and Ovarian Cancer PrEdiction                    | US              | 2003-2009    | Hospital registries and active surveillance of medical practices in Western PA, Northeastern OH, and Western NY                              | Medical chart review for all cases                                                                                                                                                                                                                                                                                                                                                                                                                      |
| HSA                                                      | Health Science Alliance Biobank                           | Australia       | 2012-present | Prince of Wales Hospital, Royal Hospital for Women, St George Hospital, Sydney NSW. Survival data Australian Institute of Health and Welfare | Pathology reports and histological slides reviewed by study pathologist                                                                                                                                                                                                                                                                                                                                                                                 |
| MAY                                                      | Mayo Clinic Ovarian Cancer Study                          | US              | 2000-2013    | Mayo Clinic medical records and death certificates                                                                                           | Pathology reports and histologic slides reviewed by Mayo Clinic gynecologic pathologists                                                                                                                                                                                                                                                                                                                                                                |
| POC                                                      | Polish Ovarian Cancer Study                               | Poland          | 2000-2003    | Hospital records and cancer registries serving Warsaw and Lodz                                                                               | Histological slides reviewed by study pathologist                                                                                                                                                                                                                                                                                                                                                                                                       |
| SEA                                                      | Study of Epidemiology and Risk Factors in Cancer Heredity | UK              | 1998-present | Eastern Region Cancer Intelligence Unit, West Midlands Cancer Intelligence Unit, and multiple cancer networks                                | Pathology reports and histological slides reviewed by study pathologist                                                                                                                                                                                                                                                                                                                                                                                 |
| SOC                                                      | Southampton Ovarian Cancer Study                          | UK              | 1993-1998    | Hospitals in the Wessex region of southern England                                                                                           | Original pathology report                                                                                                                                                                                                                                                                                                                                                                                                                               |

|     |                                                                 |           |              |                                                                                                                                                                                                                            |                                                                                                            |
|-----|-----------------------------------------------------------------|-----------|--------------|----------------------------------------------------------------------------------------------------------------------------------------------------------------------------------------------------------------------------|------------------------------------------------------------------------------------------------------------|
| SWE | Sweden Western Region Ovarian Cancer Study                      | Sweden    | 2001-2016    | Sahlgrenska University Hospital, medical records and the clinical cancer register in the western Sweden health care region and Swedish death register                                                                      | Original pathology report. For specific studies i.e. Tissue-micro-arrays re-evaluated by gyno-pathologist  |
| TVA | Ovarian Cancer in Alberta and British Columbia Study            | Canada    | 2005-2011    | Alberta Cancer Registry and affiliated hospitals                                                                                                                                                                           | Pathology reports and histological slides reviewed by study pathologist (MK)                               |
| UKO | United Kingdom Ovarian Cancer Population study                  | UK        | 2006-2010    | Ten major Gynecologic Oncology NHS centers in England, Wales and Northern Ireland; cancer registries; NHS Information Centre for Health and Social Care (England and Wales) and Central Services Agency (Northern Ireland) | Central review of pathology reports by gynecologic oncologist                                              |
| VAN | Vancouver Ovarian Cancer Study                                  | Canada    | 1984-2000    | Ovarian Cancer Registry serving British Columbia and the Cheryl Brown Outcomes Unit                                                                                                                                        | Central review of pathology reports and histological slides by University of British Columbia pathologists |
| WMH | Westmead Hospital, Gynaecological Oncology Biobank (GynBiobank) | Australia | 1992-present | The Crown Princess Mary Cancer Centre and affiliated hospitals                                                                                                                                                             | Pathology reports and diagnostic slides reviewed by panel of gynecologic pathologists                      |

**Supplementary Table 3: Concordance of SATB2 expression using two different antibodies**

| SATB2 (1) | SATB2 (2) |       |         | Total |
|-----------|-----------|-------|---------|-------|
|           | Absent    | Focal | Diffuse |       |
| Absent    | 136       | 3     | 6       | 145   |
| Focal     | 4         | 28    | 9       | 41    |
| Diffuse   |           | 2     | 186     | 188   |
| Total     | 140       | 33    | 201     | 374   |

Concordance 94%

**Supplementary Table 4: Expression of CK7/CK20/CDX2/SATB2/PAX8 by gastrointestinal histological subtypes**

| Subtype            | Colorectal |           |      | Appendiceal |       |      | Total |
|--------------------|------------|-----------|------|-------------|-------|------|-------|
|                    | Total      | Carcinoid | GCC  | HGMN        | LAMN  | NMA  |       |
| N                  | 123        | 20        | 39   | 12          | 24    | 12   | 107   |
|                    | 110        | 17        | 23   | 9           | 19    | 8    | 76    |
| Absent (n, %)      | 89.4       | 85.0      | 59.0 | 75.0        | 79.2  | 66.7 | 71.0  |
|                    | 8          | 2         | 8    | 2           | 4     | 2    | 18    |
| CK7 Focal (n, %)   | 6.5        | 10.0      | 20.5 | 16.7        | 16.7  | 16.7 | 16.8  |
|                    | 5          | 1         | 8    | 1           | 1     | 2    | 13    |
| Diffuse (n, %)     | 4.1        | 5.0       | 20.5 | 8.3         | 4.2   | 16.7 | 12.1  |
| Present (%)        | 10.6       | 15.0      | 41.0 | 25.0        | 20.8  | 33.3 | 29.0  |
|                    | 12         | 14        | 1    | 0           | 0     | 3    | 18    |
| Absent (n, %)      | 9.8        | 70.0      | 2.6  | 0.0         | 0.0   | 25.0 | 16.8  |
|                    | 26         | 5         | 3    | 2           | 1     | 1    | 12    |
| CK20 Focal (n, %)  | 21.1       | 25.0      | 7.7  | 16.7        | 4.2   | 8.3  | 11.2  |
|                    | 85         | 1         | 35   | 10          | 23    | 8    | 77    |
| Diffuse (n, %)     | 69.1       | 5.0       | 89.7 | 83.3        | 95.8  | 66.7 | 72.0  |
| Present (%)        | 90.2       | 30.0      | 97.4 | 100.0       | 100.0 | 75.0 | 83.2  |
|                    | 1          | 1         | 1    | 0           | 0     | 1    | 3     |
| Absent (n, %)      | 0.8        | 5.0       | 2.6  | 0.0         | 0.0   | 8.3  | 2.8   |
|                    | 12         | 3         | 2    | 0           | 0     | 1    | 6     |
| CDX2 Focal (n, %)  | 9.8        | 15.0      | 5.1  | 0.0         | 0.0   | 8.3  | 5.6   |
|                    | 110        | 16        | 36   | 12          | 24    | 10   | 98    |
| Diffuse (n, %)     | 89.4       | 80.0      | 92.3 | 100.0       | 100.0 | 83.3 | 91.6  |
| Present (%)        | 99.2       | 95.0      | 97.4 | 100.0       | 100.0 | 91.7 | 97.2  |
|                    | 10         | 2         | 5    | 3           | 1     | 2    | 13    |
| Absent (n, %)      | 8.1        | 10.0      | 12.8 | 25.0        | 4.2   | 16.7 | 12.1  |
|                    | 19         | 2         | 2    | 0           | 0     | 0    | 4     |
| SATB2 Focal (n, %) | 15.4       | 10.0      | 5.1  | 0.0         | 0.0   | 0.0  | 3.7   |
|                    | 94         | 16        | 32   | 9           | 23    | 10   | 90    |
| Diffuse (n, %)     | 76.4       | 80.0      | 82.1 | 75.0        | 95.8  | 83.3 | 84.1  |
| Present (%)        | 91.9       | 90.0      | 87.2 | 75.0        | 95.8  | 83.3 | 87.9  |
|                    | 123        | 18        | 38   | 12          | 24    | 9    | 101   |
| Absent (n, %)      | 100.0      | 90.0      | 97.4 | 100.0       | 100.0 | 75.0 | 94.4  |
|                    | 0          | 0         | 0    | 0           | 0     | 0    | 0     |
| PAX8 Focal (n, %)  | 0.0        | 0.0       | 0.0  | 0.0         | 0.0   | 0.0  | 0.0   |
|                    | 0          | 2         | 1    | 0           | 0     | 3    | 6     |
| Diffuse (n, %)     | 0.0        | 10.0      | 2.6  | 0.0         | 0.0   | 25.0 | 5.6   |
| Present (%)        | 0.0        | 10.0      | 2.6  | 0.0         | 0.0   | 25.0 | 5.6   |

GCC (goblet cell carcinoma); HGMN (high grade malignant neoplasm);

LAMN (low grade appendiceal malignant neoplasm); NMA (non-mucinous appendiceal)

**Supplementary Table 5: Review of ovarian tumors with staining suggestive of lower GI metastases**

| OTTA ID   | Abberant staining     | Diagnosis | Year of study entry | Final status | FU month   | Morphological features | SATB2   | PAX8    | Re-evaluation                                      |
|-----------|-----------------------|-----------|---------------------|--------------|------------|------------------------|---------|---------|----------------------------------------------------|
| TAOV20693 | CK7 negative ovarian  | MBOT      | 1999                | alive        | <b>120</b> |                        |         |         | Ovarian primary consistent with long survival time |
| TAOV20804 | CK7 negative ovarian  | MBOT      | 2000                | alive        | <b>120</b> |                        |         |         | Ovarian primary consistent with long survival time |
| TAOV20130 | CK7 negative ovarian  | MBOT      | 2010                | alive        | <b>70</b>  |                        |         |         | Ovarian primary consistent with long survival time |
| TAOV20975 | CK7 negative ovarian  | MC        | 2004                | dead         | 9          | Teratoma               | Diffuse | absent  | Ovarian primary based on associated teratoma       |
| TAOV21174 | SATB2 diffuse ovarian | MC        | 2009                | dead         | 18         | Teratoma               | Diffuse | absent  | Ovarian primary based on associated teratoma       |
| TAOV20721 | SATB2 diffuse ovarian | MBOT      | 1999                | alive        | <b>120</b> |                        |         |         | Ovarian primary consistent with long survival time |
| TAOV20939 | SATB2 diffuse ovarian | MC        | 2003                | alive        | <b>120</b> |                        |         |         | Ovarian primary consistent with long survival time |
| TAOV20111 | SATB2 diffuse ovarian | MBOT      | 2010                | alive        | <b>65</b>  |                        |         |         | Ovarian primary consistent with long survival time |
| TAOV21048 | SATB2 diffuse ovarian | MC        | 2006                | dead         | 14         | anaplastic             | Diffuse | present | Ovarian primary supported by PAX8 expression       |
| TAOV20843 | SATB2 diffuse ovarian | MC        | 2001                | dead         | 16         | multifocal destructive | Diffuse | present | Ovarian primary supported by PAX8 expression       |
| TAOV21180 | SATB2 diffuse ovarian | MC        | 2009                | alive        | 22         | suspicious             | Diffuse | absent  | Lower GI metastasis                                |
